# Supplementary material for: Salicylic acid treatment and expression of an RNA-dependent RNA polymerase 1 transgene inhibit lethal symptoms and meristem invasion during tobacco mosaic virus infection in Nicotiana benthamiana
Source: PubMed Central journal article supplement (PMC4710973; doi:10.1186/s12870-016-0705-8), 2016-01-13
Supplement: 12870_2016_705_MOESM1_ESM.pdf [file 12870_2016_705_MOESM1_ESM.pdf]

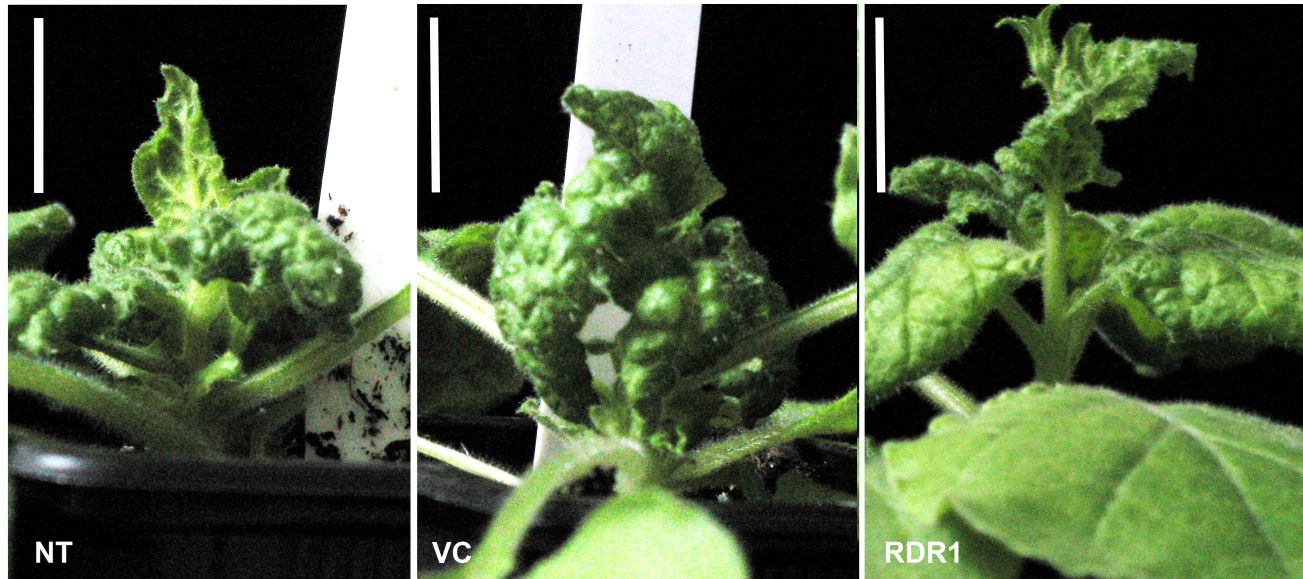

#### Additional File 1

Comparison of symptom severity in *N. benthamiana* 15 days post inoculation with TMV.GFP, showing that transgenic *N. benthamiana* expressing MtRDR1 is less severely stunted compared to the non-transgenic and empty-vector control plants.

NT= non transgenic plant.

VC= vector control transgenic plant.

RDR1= Transgenic *N. benthamiana* expressing MtRDR1.

Scale bar = 1.5 cm.
