# Supplementary material for: Salicylic acid treatment and expression of an RNA-dependent RNA polymerase 1 transgene inhibit lethal symptoms and meristem invasion during tobacco mosaic virus infection in Nicotiana benthamiana
Source: PubMed Central journal article supplement (PMC4710973; doi:10.1186/s12870-016-0705-8), 2016-01-13
Supplement: 12870_2016_705_MOESM2_ESM.pdf [file 12870_2016_705_MOESM2_ESM.pdf]

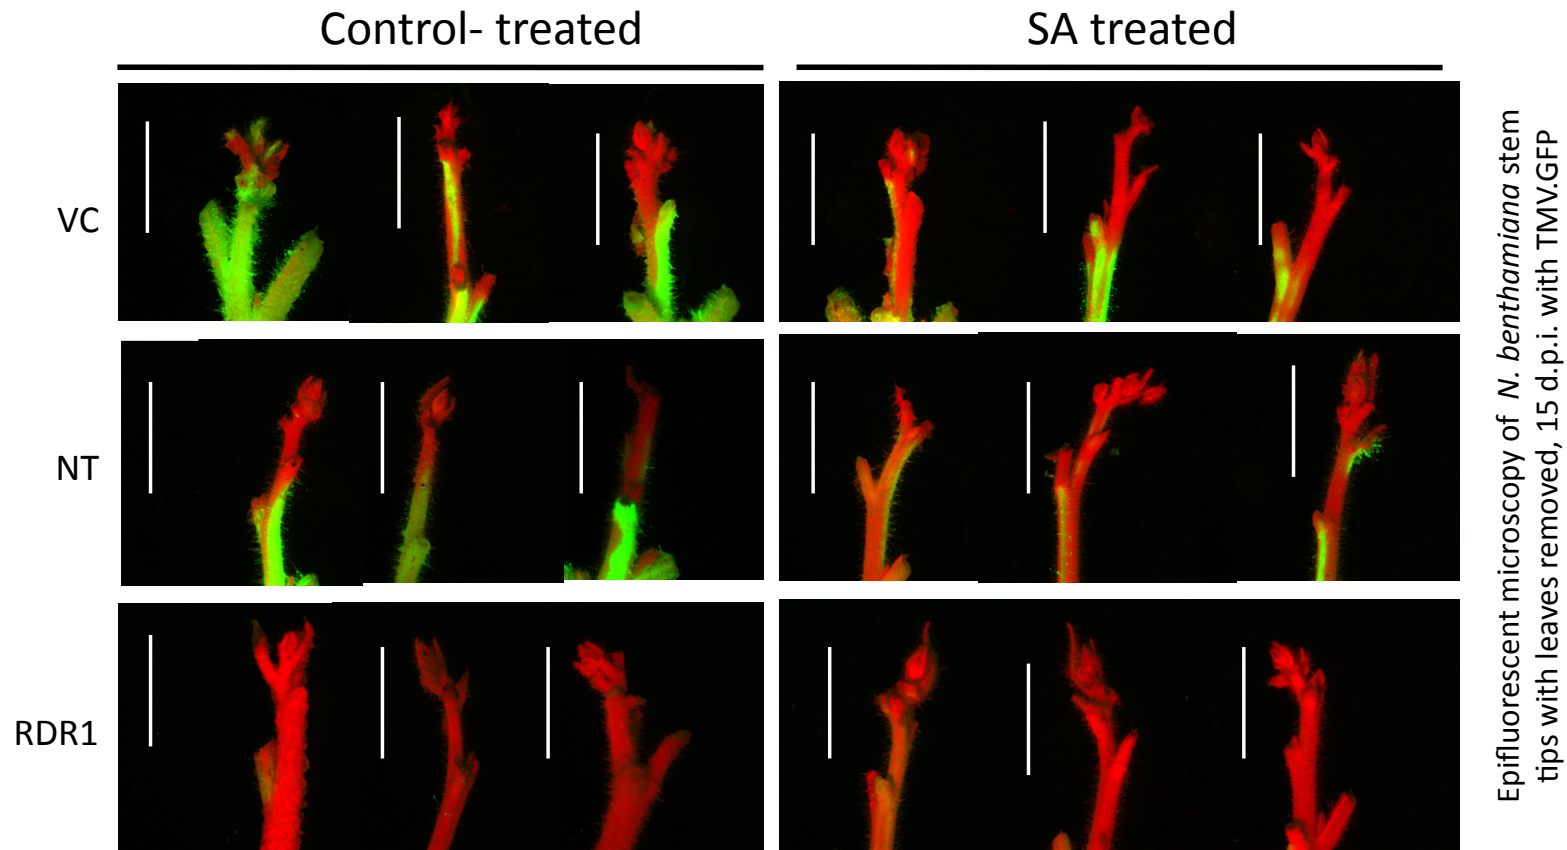

Additional File 2

Transgenic *N. benthamiana* plants expressing *MtRDR1* prevents infection of the stem tissue adjacent to the meristem by TMV.GFP.

scale bar = 3mm
