# Supplementary material for: Salicylic acid treatment and expression of an RNA-dependent RNA polymerase 1 transgene inhibit lethal symptoms and meristem invasion during tobacco mosaic virus infection in Nicotiana benthamiana
Source: PubMed Central journal article supplement (PMC4710973; doi:10.1186/s12870-016-0705-8), 2016-01-13
Supplement: 12870_2016_705_MOESM4_ESM.pdf [file 12870_2016_705_MOESM4_ESM.pdf]

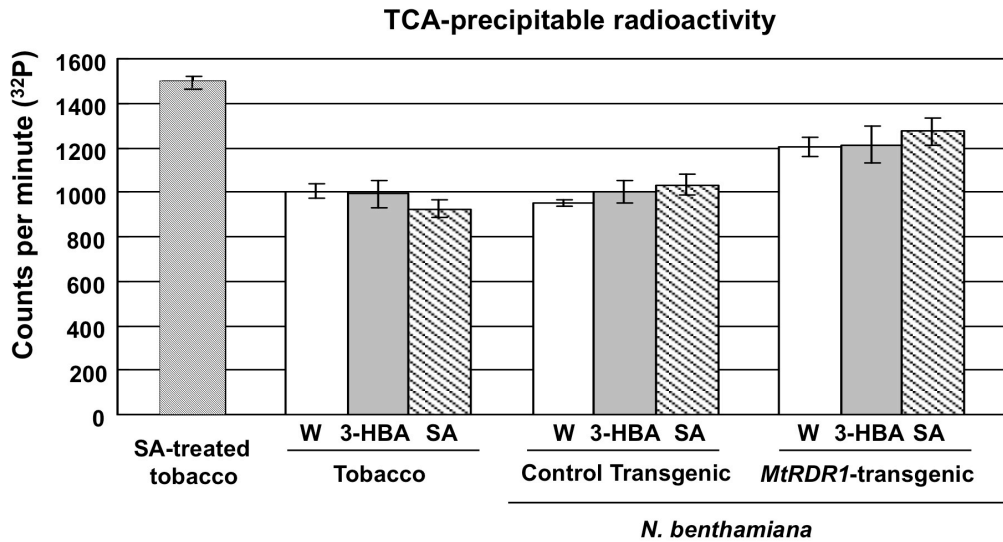

**Additional File 4: RDR activity in extracts from tobacco and *Nicotiana benthamiana* plants is not increased by *in vitro* treatment with SA.** Leaves of tobacco (*N. tabacum*), control-transgenic and *MtRDR1*-transgenic *N. benthamiana* plants were harvested 48 hours post-infiltration with water and RDR1-enriched protein extracts isolated. SA or 3-hydroxybenzoic acid (3-HBA, a biologically inactive isomer of SA) at final concentrations of 2.5mM, or water (W) amended with 0.05% (v/v) ethanol was added to the plant protein extracts immediately before they were assayed for RDR activity. RDR assays were performed in a reaction containing  $\alpha$ -[<sup>32</sup>P] CTP, NTPs and RNA extracted from TMV-infected tobacco plants. The proxy for RDR activity was the incorporation of  $\alpha$ -[<sup>32</sup>P] CTP into nascent RNA analysed by liquid scintillation counting of radioactivity incorporated (counts per minute) into trichloroacetic acid (TCA)-precipitable material. An NtRDR1-enriched protein extract from SA-infiltrated tobacco leaves was used as a positive control (SA-treated tobacco). Error bars are standard errors for the mean for three technical replicates (RDR assays) per sample.
