# Supplementary material for: Salicylic acid treatment and expression of an RNA-dependent RNA polymerase 1 transgene inhibit lethal symptoms and meristem invasion during tobacco mosaic virus infection in Nicotiana benthamiana
Source: PubMed Central journal article supplement (PMC4710973; doi:10.1186/s12870-016-0705-8), 2016-01-13
Supplement: 12870_2016_705_MOESM6_ESM.pdf [file 12870_2016_705_MOESM6_ESM.pdf]

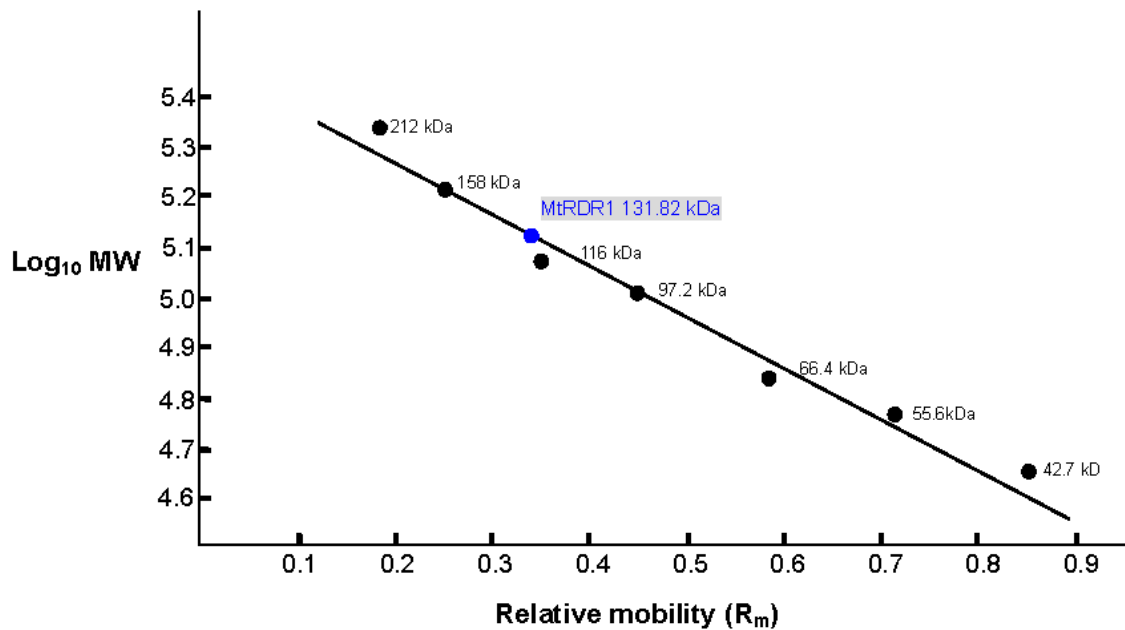

**Additional File 6: Calibration curve to determine the molecular weight ( $\log_{10}$  MW) of protein detected by anti-MtrRDR1 serum on SDS-PAGE gel.** A calibration curve of the  $\log_{10}$  protein molecular weight (MW) versus relative mobility ( $R_m$ ) was plotted for the molecular marker protein standards run on a 10% (w/v) acrylamide SDS-PAGE gel subjected to immunoblot analysis with anti-MtrRDR1 serum. The protein standards used had relative molecular masses of 212, 158, 116, 97.2, 66.4, 55.6 and 42.7 kDa respectively. The curve was used to determine the molecular weight of the protein specifically detected by the anti-MtrRDR1 serum as being 131.8 kDa, corresponding to MtrRDR1.
