# Supplementary material for: Salicylic acid treatment and expression of an RNA-dependent RNA polymerase 1 transgene inhibit lethal symptoms and meristem invasion during tobacco mosaic virus infection in Nicotiana benthamiana
Source: PubMed Central journal article supplement (PMC4710973; doi:10.1186/s12870-016-0705-8), 2016-01-13
Supplement: 12870_2016_705_MOESM7_ESM.pdf [file 12870_2016_705_MOESM7_ESM.pdf]

### Predicted protein sequence for MtRDR1

MVKS<sup>U</sup>KTIELYGFPHYVTVPDVKRFVEQYTGEGSVVAIKIREGKARIRTAFAIIQFTTKD<sup>U</sup>HV  
TDMMALPSRSL<sup>U</sup>PLQYGSSYLKVREMERDIVRRPREILH<sup>U</sup>SLNDVKLYFCCQISEERL<sup>U</sup>SV  
LWREVDVRVDFGIGMRKWPFTLCHDNKTFKLEL<sup>U</sup>SYENIWKIELHQPRSKTTKYLLIQLIG  
APRVFELYSPTSDDA<sup>U</sup>YNVYEDLS<sup>U</sup>KNYFSDPPDDQWIRAVDFTPCSCIGQSSALCLELPS<sup>U</sup>  
NRDFPNFRENFAQYEEESAGPYMLESGSPFSCNLDVVPMSPPQGIQIPFDILFKVNSLV  
QHGCL<sup>U</sup>SG<sup>U</sup>SELDNAFYHLVDPTRVNVELIENALEKMYYSNDFCYEPVRWLKDQYKMYH  
SSNNLPRSPTISLDNGLVYVRAQIT<sup>U</sup>PCKVYFCGPEINVSNRVLRKYKKHMDNFLRV<sup>U</sup>SF  
VDEELD<sup>U</sup>KLYSSDL<sup>U</sup>SRIS<sup>U</sup>VGGRTDIYRILSILRNGIVIGDKKFEFLAFSSSQLRES<sup>U</sup>SLWM  
FARTPTGDTAG<sup>U</sup>SIREWMGDFSRIKNVAKYAARLGQSF<sup>U</sup>SS<sup>U</sup>TETT<sup>U</sup>TV<sup>U</sup>SS<sup>U</sup>TEIEIILDVHNK  
TK<sup>U</sup>YVFSDGIGKISLELARRVAQKCG<sup>U</sup>YDSMPSAFQIRYGGYKGVVAVDPTSSVKL<sup>U</sup>SLRMS<sup>U</sup>  
MLK<sup>U</sup>YDSDNTDL<sup>U</sup>DLACSKFRPCYLN<sup>U</sup>RQLITLLSTLDVED<sup>U</sup>SVFEKKQKEAVDQLNTIL<sup>U</sup>TDS<sup>U</sup>  
TKAHEVLDLMSSGEVTNLIKEMLICGYKPNVEPFLSMMLQTFRASKLLELRQKTRIFIPK  
GRAMMGVLDETRTLEYGEV<sup>U</sup>FVQYSNNREDSLSHV<sup>U</sup>VNGKV<sup>U</sup>VVAKNPCLYPGDV<sup>U</sup>RVLKA  
VDVPALRHMVDCV<sup>U</sup>VFPQK<sup>U</sup>GHRPH<sup>U</sup>NECSG<sup>U</sup>SDLGDIYFVCWDSELIPPKTIDPMEYDS<sup>U</sup>  
AK<sup>U</sup>PIVLDHDVEIEEVQKYFTDYILNDCLGIIANAHTVFAD<sup>U</sup>KEPGKAMADPCVELAKLFSTA  
VDFPKTGIPAEIPRGLFPTEYPDFMEKPKPI<sup>U</sup>YKSKNVIGKLFREIQG<sup>U</sup>STKDGSITSFTLE  
VA<sup>U</sup>KES<sup>U</sup>YDS<sup>U</sup>DMEFEGFMDYVDDAFYHKTNYDYKLG<sup>U</sup>NLMDYYG<sup>U</sup>IKTEAEILSGNIMKMSK  
SFTKKRDADAITMAVR<sup>U</sup>SLRKEARS<sup>U</sup>WFTDSGAGVDS<sup>U</sup>GSDDA<sup>U</sup>YAKASAWYYV<sup>U</sup>TYHHSY<sup>U</sup>  
GLYNEGMQRDHFLSFPWC<sup>U</sup>VYHLLV<sup>U</sup>QIKKEKARMKMHS<sup>U</sup>RMEQSFSHRLRLD

**Additional File 7: Predicted ubiquitination and phosphorylation sites in the MtRDR1 amino acid sequence.** Potential ubiquitination sites are back-shaded in black (medium confidence prediction) or high-lighted in green (low confidence prediction). Amino acid residues predicted to be potential phosphorylation sites in the translated MtRDR1 protein sequence are underlined and highlighted in blue. Phosphorylation sites were predicted using NetPhos 2.0 software [64]. Only residues with a potential phosphorylation score > 0.850 (high confidence prediction) have been marked above. Ubiquitination sites were predicted using UbPred software [65].
