# Supplementary material for: Salicylic acid treatment and expression of an RNA-dependent RNA polymerase 1 transgene inhibit lethal symptoms and meristem invasion during tobacco mosaic virus infection in Nicotiana benthamiana
Source: PubMed Central journal article supplement (PMC4710973; doi:10.1186/s12870-016-0705-8), 2016-01-13
Supplement: 12870_2016_705_MOESM8_ESM.pdf [file 12870_2016_705_MOESM8_ESM.pdf]

1 **Additional File 8: Table of primers used for semi-quantitative and quantitative PCR**

| <b>Target transcript</b> | <b>Primer name</b> | <b>Strand</b> | <b>Primer sequences (5' → 3')</b> | <b>PCR Application</b> |
|--------------------------|--------------------|---------------|-----------------------------------|------------------------|
| <i>NbPR1a</i>            | PR1a 5'            | F             | AGGGATCCATGGGATTTGTTCTCTTT        | Semi-Quantitative      |
|                          | PR1a 3'            | R             | AGGAGCTCTTAGTATGGACTTTCGCC        |                        |
| <i>MtRDR1</i>            | MtRDR1 5'          | F             | ATTCCCTCATTATGTGACTGTGCC          | Semi-Quantitative      |
|                          | MtRDR1 3'          | R             | CCGTGGTTGATGCAGCTCAATC            |                        |
| <i>NbRDR1m</i>           | NbRDR1m 5'         | F             | TGTTGGGATCCAGACCTGGTT             | Semi-Quantitative      |
|                          | NbRDR1m 3'         | R             | TCAACTTCCTCAATTGTGACATCAT         |                        |
| <i>NbEF1α</i>            | EF1α 5'            | F             | ACGCTTGAGATCCTTAACCGCAACATTCTT    | Semi-Quantitative      |
|                          | EF1α 3'            | R             | TGGTGTCCCTCAAGCCTGGTATGGTTGT      |                        |
| <i>MtRDR1</i>            | MtRDR1 QPCR A5'    | F             | AGGAGAAAGCCAGGATGAAGATGC          | Quantitative           |
|                          | MtRDR1 QPCR A3'    | R             | CAAGACGCAACCTGTGACTGAAAC          |                        |
| <i>NbEF1α</i>            | NbEF1α QPCR B5'    | F             | TGCCTTGTGGAAGTTTGAGACC            | Quantitative           |
|                          | NbEF1α QPCR B3'    | R             | GGTGGAGTCAATAATCAGGACAGC          |                        |

2

3

4
